# Supplementary material for: A tunable light scattering device fabricated using pseudopeptide polymer incorporated chiral nematic liquid crystal
Source: Royal Society of Chemistry journal article supplement (doi:10.1039/d4tc03670k), 2024-01-01
Supplement: d4tc03670k1.pdf [file d4tc03670k1.pdf]

## Supporting Information

# A tunable light scattering device fabricated using pseudopeptide polymer incorporated chiral nematic liquid crystal

Rishikesh Kushawaha<sup>a</sup>, Sagar Jawla<sup>b</sup>, V. Haridas<sup>b</sup>, Aloka Sinha<sup>\*a</sup>

<sup>a</sup>Department of Physics, Indian Institute of Technology Delhi, New Delhi 110016, India. \*aloka@physics.iitd.ac.in

<sup>b</sup>Department of Chemistry, Indian Institute of Technology Delhi, New Delhi 110016, India.

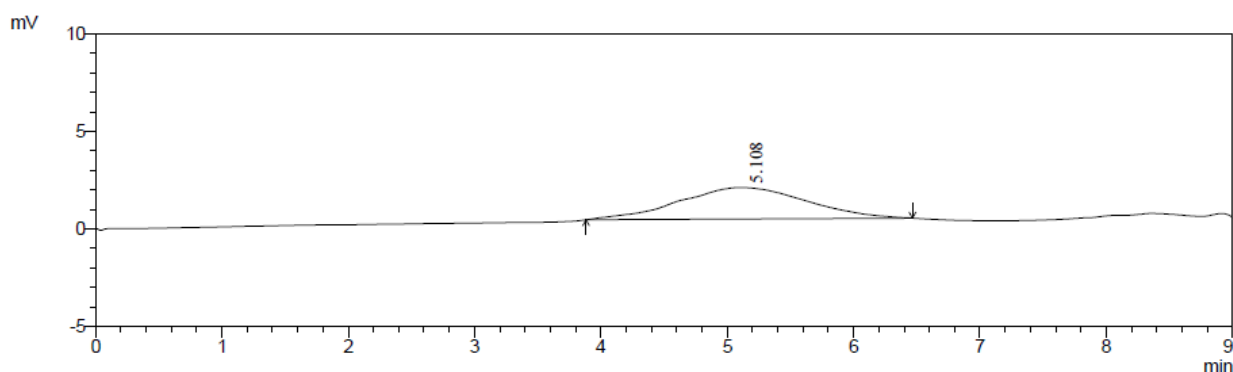

### GPC Calculation Results

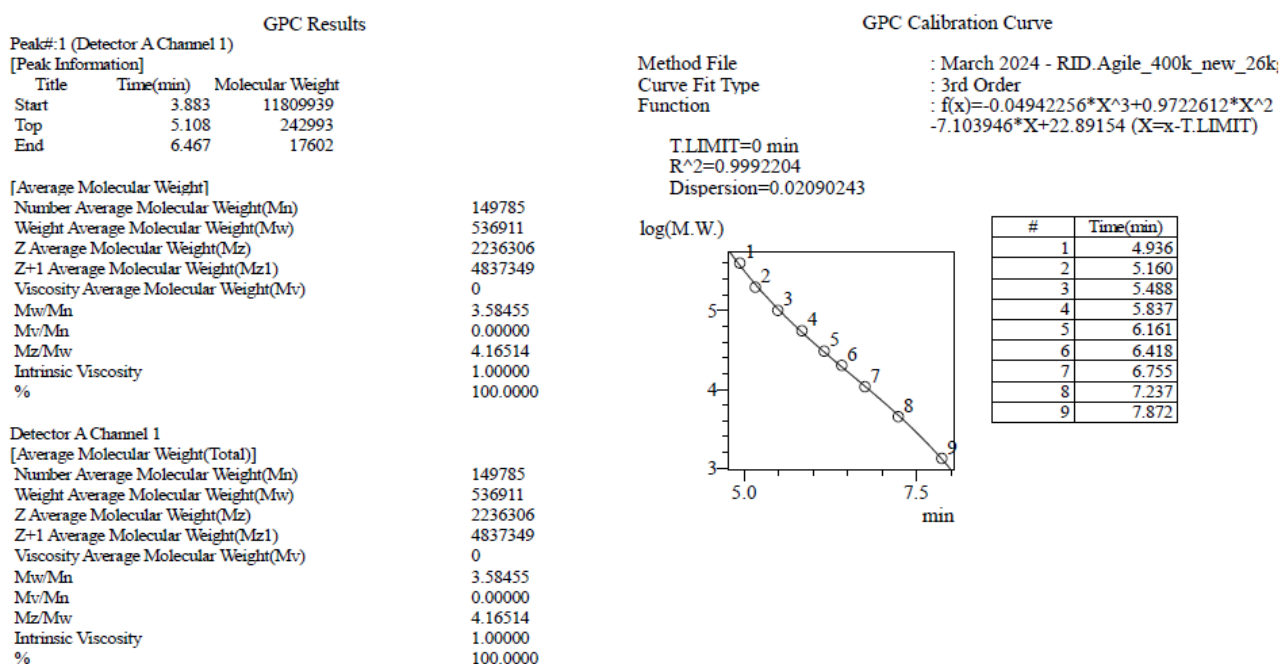

Figure S1. GPC analysis of the polymer

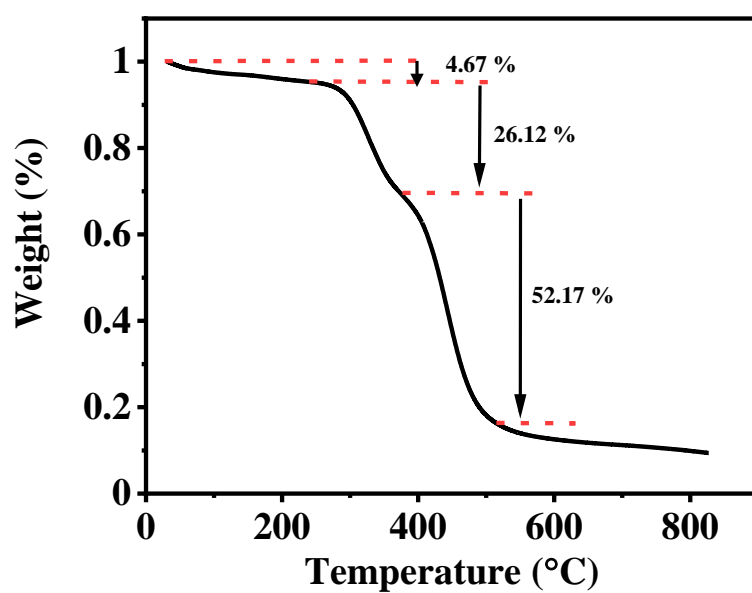

**Figure S2.** Thermogravimetric analysis (TGA) of NBFoMe Polymer

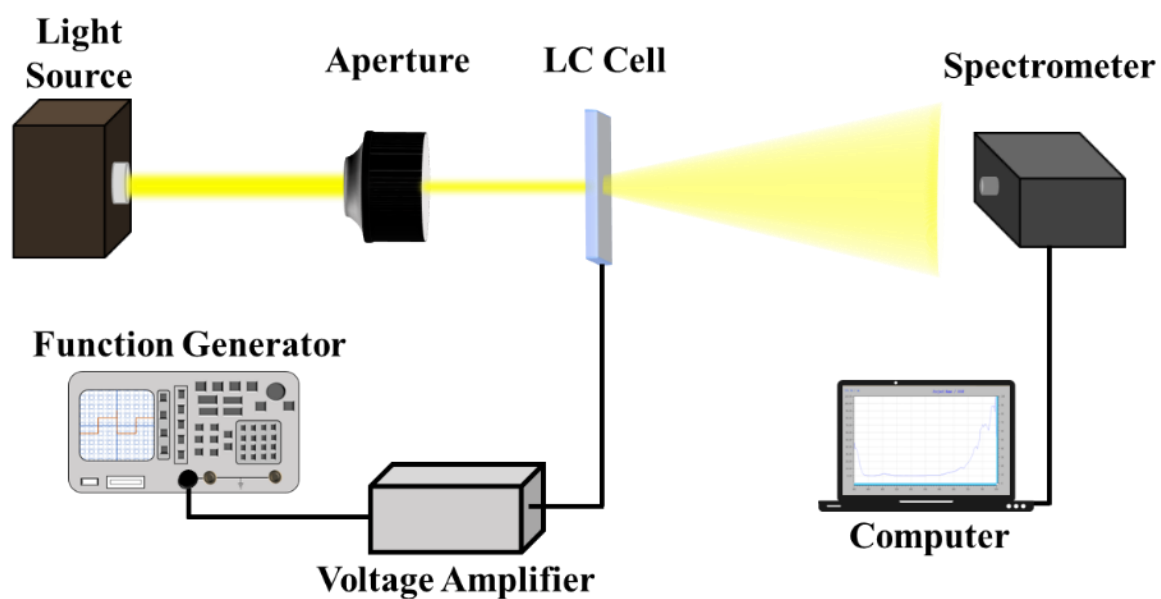

**Figure S3.** Schematic diagram of the set-up to measure the wavelength-dependent direct transmittance measurement.

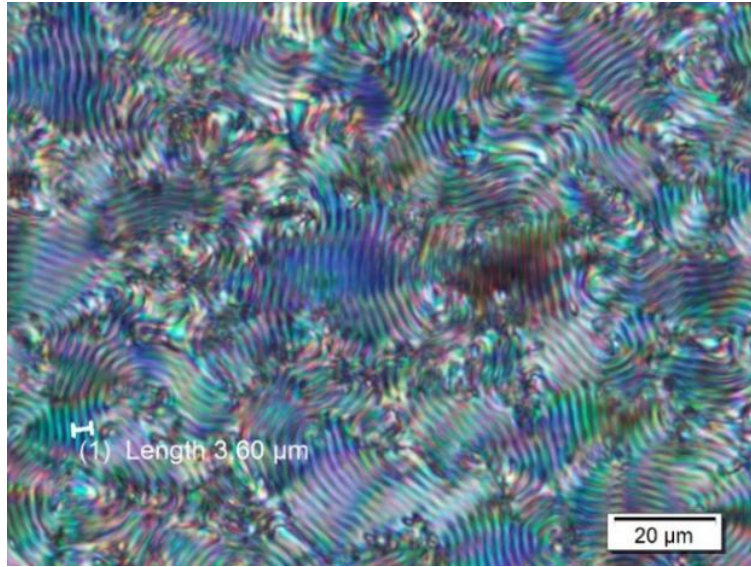

**Figure S4.** Optical texture of the 96:04 wt. % E7:CB15 LC in unaligned LC cell.

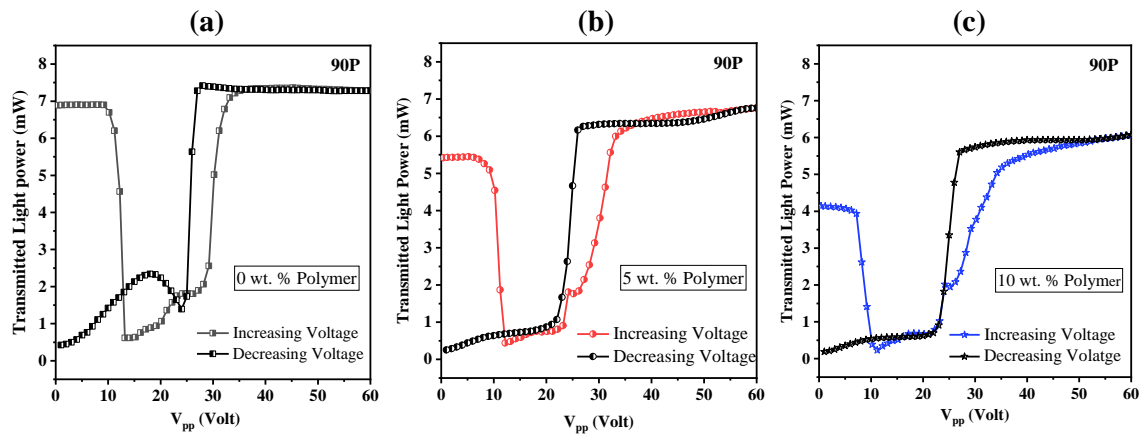

**Figure S5.** The direct transmission of the He-Ne laser beam passes through the LC cell for 90P polarization state with increasing and decreasing voltage.

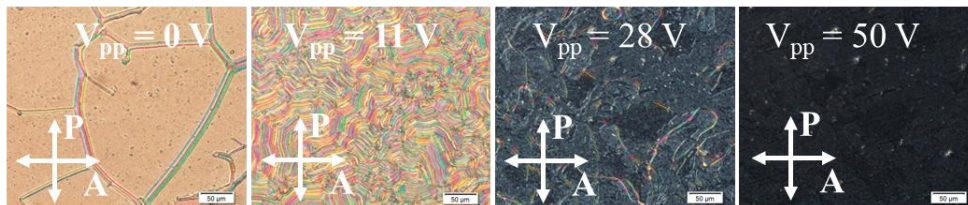

**Figure S6.** Optical texture of the 10 wt. % polymer LC cell after 8 months of the fabrication

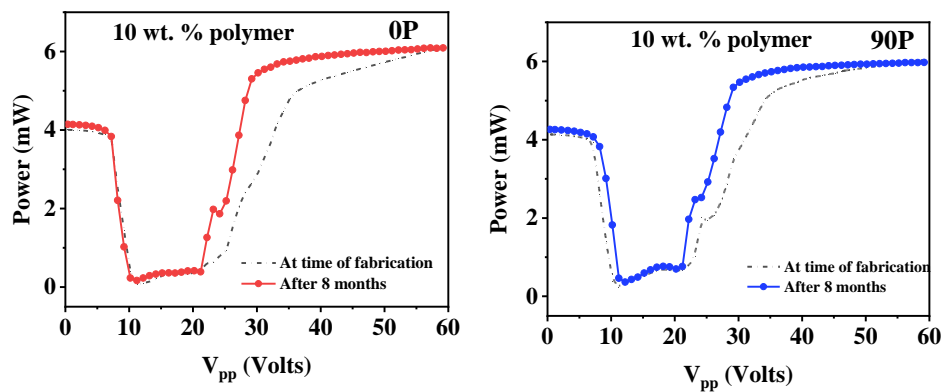

**Figure S7.** Voltage-dependent direct light transmission of the 10 wt. % polymer LC cell at the time of the fabrication and after 8 months of the fabrication. The frequency of the square wave is 1kHz.
